# Supplementary material for: Ion-combination specific effects driving the enzymatic activity of halophilic alcohol dehydrogenase 2 from Haloferax volcanii in aqueous ionic liquid solvent mixtures
Source: RSC Sustain. 2024 Jul 8;2(9):2559–80. doi: 10.1039/d3su00412k (PMC11353702; doi:10.1039/d3su00412k)
Supplement: SU-002-D3SU00412K-s002 [file SU-002-D3SU00412K-s002.xlsx]

## Sheet: ILs A-M
	TmsMs	Trimethylsulfonium Methylsulfate
	Tetrakis	Tetrakis(hydroxymethyl) phosphonium chloride
	ChCh	Choline Chloride
	ChBit	Choline Bitartrate
	Time	Time points [min]	Buffer Blank	Buffer Reaction	Buffer Reaction	Average	Buffer	std		Blank 0.025M TmsMs	Reaction 0.025M TmsMs	Reaction 0.025M TmsMs	Average	Blanked IL A 0.025M	relative Activity [%]	stdev_duplicate_formula	Blank 0.15M TmsMs	Reaction 0.15M TmsMs	Reaction 0.15M TmsMs	Average	IL A 0.15M	relative Activity [%]	stdev_duplicate_formula	Blank 0.75M TmsMs	Reaction 0.75M TmsMs	Reaction 0.75M TmsMs	Average	IL A 0.75M	relative Activity [%]	stdev_duplicate_formula		Blank 0.025M Tetrakis	Reaction 0.025M Tetrakis	Reaction 0.025M Tetrakis	Average	IL B 0.025M	relative Activity [%]	stdev_duplicate_formula	Blank 0.15M Tetrakis	Reaction 0.15M Tetrakis	Reaction 0.15M Tetrakis	Average	IL B 0.15M	relative Activity [%]	stdev_duplicate_formula	Blank 0.75M Tetrakis	Reaction 0.75M Tetrakis	Reaction 0.75M Tetrakis	Average
	00:00:14	0	0.117	0.131	0.153	0.142	0.025	0.022		0.067	0.08	0.137	0.1085	0.0415	166	0.057	0.077	0.08	0.082	0.081	0.004	16	0.002	0.107	0.075	0.07	0.0725	0	0	0.005		0.085	0.064	0.059	0.0615	0	0	0.005	0.062	0.065	0.056	0.0605	0	0	0.009	0.066	0.106	0.093	0.0995
	00:01:14	1	0.115	0.14	0.177	0.1585	0.0435	0.037		0.071	0.108	0.157	0.1325	0.0615	141.379	0.049	0.077	0.1	0.085	0.0925	0.0155	35.6322	0.015	0.099	0.106	0.07	0.088	0	0	0.036		0.089	0.074	0.059	0.0665	0	0	0.015	0.063	0.068	0.061	0.0645	0.0015	3.44828	0.007	0.074	0.101	0.104	0.1025
	00:02:14	2	0.113	0.161	0.199	0.18	0.067	0.038		0.072	0.13	0.197	0.1635	0.0915	136.567	0.067	0.076	0.117	0.101	0.109	0.033	49.2537	0.016	0.091	0.113	0.073	0.093	0.002	2.98507	0.04		0.094	0.079	0.058	0.0685	0	0	0.021	0.063	0.07	0.055	0.0625	0	0	0.015	0.075	0.096	0.114	0.105
	00:03:14	3	0.108	0.188	0.237	0.2125	0.1045	0.049		0.071	0.173	0.274	0.2235	0.1525	145.933	0.101	0.076	0.13	0.127	0.1285	0.0525	50.2392	0.003	0.087	0.121	0.088	0.1045	0.0175	16.7464	0.033		0.095	0.094	0.068	0.081	0	0	0.026	0.064	0.069	0.068	0.0685	0.0045	4.30622	0.001	0.076	0.092	0.119	0.1055
	00:04:14	4	0.113	0.203	0.305	0.254	0.141	0.102		0.07	0.217	0.335	0.276	0.206	146.099	0.118	0.075	0.142	0.163	0.1525	0.0775	54.9645	0.021	0.08	0.122	0.097	0.1095	0.0295	20.922	0.025		0.089	0.094	0.079	0.0865	0	0	0.015	0.063	0.073	0.076	0.0745	0.0115	8.15603	0.003	0.074	0.093	0.121	0.107
	00:05:14	5	0.112	0.261	0.305	0.283	0.171	0.044		0.071	0.243	0.397	0.32	0.249	145.614	0.154	0.076	0.164	0.2	0.182	0.106	61.9883	0.036	0.082	0.124	0.095	0.1095	0.0275	16.0819	0.029		0.085	0.091	0.083	0.087	0.002	1.16959	0.008	0.063	0.077	0.079	0.078	0.015	8.77193	0.002	0.073	0.092	0.13	0.111
	00:06:14	6	0.11	0.307	0.359	0.333	0.223	0.052		0.072	0.305	0.461	0.383	0.311	139.462	0.156	0.073	0.192	0.231	0.2115	0.1385	62.1076	0.039	0.082	0.136	0.099	0.1175	0.0355	15.9193	0.037		0.084	0.088	0.082	0.085	0.001	0.44843	0.006	0.064	0.085	0.08	0.0825	0.0185	8.29596	0.005	0.074	0.093	0.137	0.115
	00:07:14	7	0.093	0.371	0.519	0.445	0.352	0.148		0.072	0.388	0.521	0.4545	0.3825	108.665	0.133	0.072	0.221	0.278	0.2495	0.1775	50.4261	0.057	0.078	0.146	0.11	0.128	0.05	14.2045	0.036		0.083	0.093	0.082	0.0875	0.0045	1.27841	0.011	0.064	0.085	0.082	0.0835	0.0195	5.53977	0.003	0.074	0.092	0.142	0.117
	00:08:14	8	0.12	0.403	0.67	0.5365	0.4165	0.267		0.067	0.452	0.592	0.522	0.455	109.244	0.14	0.072	0.258	0.321	0.2895	0.2175	52.2209	0.063	0.081	0.16	0.125	0.1425	0.0615	14.7659	0.035		0.09	0.095	0.071	0.083	0	0	0.024	0.063	0.077	0.08	0.0785	0.0155	3.72149	0.003	0.074	0.092	0.139	0.1155
	00:09:14	9	0.122	0.442	0.754	0.598	0.476	0.312		0.066	0.55	0.686	0.618	0.552	115.966	0.136	0.072	0.299	0.354	0.3265	0.2545	53.4664	0.055	0.079	0.177	0.161	0.169	0.09	18.9076	0.016		0.083	0.095	0.071	0.083	0	0	0.024	0.063	0.077	0.079	0.078	0.015	3.15126	0.002	0.074	0.097	0.124	0.1105
	00:10:14	10	0.121	0.579	0.911	0.745	0.624	0.332		0.065	0.63	0.792	0.711	0.646	103.526	0.162	0.074	0.338	0.402	0.37	0.296	47.4359	0.064	0.076	0.201	0.193	0.197	0.121	19.391	0.008		0.081	0.096	0.067	0.0815	0.0005	0.0801282	0.029	0.065	0.078	0.078	0.078	0.013	2.08333	0	0.075	0.1	0.102	0.101
	00:11:14	11	0.125	0.721	0.929	0.825	0.7	0.208		0.066	0.695	0.895	0.795	0.729	104.143	0.2	0.072	0.394	0.469	0.4315	0.3595	51.3571	0.075	0.081	0.216	0.201	0.2085	0.1275	18.2143	0.015		0.083	0.101	0.073	0.087	0.004	0.571429	0.028	0.064	0.076	0.08	0.078	0.014	2	0.004	0.078	0.101	0.099	0.1
	00:12:14	12	0.12	0.715	1.173	0.944	0.824	0.458		0.063	0.777	0.961	0.869	0.806	97.8155	0.184	0.074	0.424	0.486	0.455	0.381	46.2379	0.062	0.08	0.24	0.228	0.234	0.154	18.6893	0.012		0.087	0.105	0.067	0.086	0	0	0.038	0.063	0.075	0.08	0.0775	0.0145	1.75971	0.005	0.078	0.102	0.102	0.102
	00:13:14	13	0.121	0.788	1.143	0.9655	0.8445	0.355		0.063	0.878	0.956	0.917	0.854	101.125	0.078	0.074	0.487	0.602	0.5445	0.4705	55.7134	0.115	0.078	0.259	0.25	0.2545	0.1765	20.8999	0.009		0.084	0.105	0.077	0.091	0.007	0.828893	0.028	0.063	0.08	0.079	0.0795	0.0165	1.95382	0.001	0.084	0.098	0.107	0.1025
	00:14:14	14	0.121	0.902	1.312	1.107	0.986	0.41		0.063	0.936	1.08	1.008	0.945	95.8418	0.144	0.075	0.531	0.655	0.593	0.518	52.5355	0.124	0.079	0.288	0.279	0.2835	0.2045	20.7404	0.009		0.084	0.107	0.082	0.0945	0.0105	1.06491	0.025	0.066	0.083	0.078	0.0805	0.0145	1.47059	0.005	0.082	0.101	0.103	0.102
	00:15:14	15	0.123	0.83	1.359	1.0945	0.9715	0.529		0.066	0.935	1.103	1.019	0.953	98.0957	0.168	0.076	0.577	0.641	0.609	0.533	54.8636	0.064	0.078	0.279	0.327	0.303	0.225	23.1601	0.048		0.083	0.104	0.08	0.092	0.009	0.926402	0.024	0.066	0.084	0.082	0.083	0.017	1.74987	0.002	0.086	0.102	0.106	0.104
	00:16:14	16	0.125	0.902	1.421	1.1615	1.0365	0.519		0.067	0.943	1.214	1.0785	1.0115	97.588	0.271	0.077	0.63	0.654	0.642	0.565	54.5104	0.024	0.078	0.321	0.36	0.3405	0.2625	25.3256	0.039		0.084	0.101	0.074	0.0875	0.0035	0.337675	0.027	0.066	0.087	0.081	0.084	0.018	1.73661	0.006	0.083	0.102	0.107	0.1045
	00:17:14	17	0.126	0.972	1.437	1.2045	1.0785	0.465		0.072	0.998	1.197	1.0975	1.0255	95.0858	0.199	0.077	0.683	0.746	0.7145	0.6375	59.1099	0.063	0.078	0.334	0.36	0.347	0.269	24.942	0.026		0.084	0.105	0.076	0.0905	0.0065	0.602689	0.029	0.069	0.096	0.082	0.089	0.02	1.85443	0.014	0.09	0.102	0.112	0.107
	00:18:14	18	0.125	1.016	1.512	1.264	1.139	0.496		0.075	1.113	1.234	1.1735	1.0985	96.4442	0.121	0.079	0.711	0.757	0.734	0.655	57.5066	0.046	0.078	0.299	0.364	0.3315	0.2535	22.2564	0.065		0.084	0.111	0.074	0.0925	0.0085	0.746269	0.037	0.068	0.103	0.083	0.093	0.025	2.19491	0.02	0.085	0.102	0.111	0.1065
	00:19:14	19	0.125	1.068	1.537	1.3025	1.1775	0.469		0.077	1.326	1.512	1.419	1.342	113.97	0.186	0.079	0.779	0.789	0.784	0.705	59.8726	0.01	0.077	0.398	0.402	0.4	0.323	27.431	0.004		0.084	0.112	0.079	0.0955	0.0115	0.976645	0.033	0.069	0.092	0.086	0.089	0.02	1.69851	0.006	0.091	0.102	0.103	0.1025
	00:20:14	20	0.125	1.099	1.599	1.349	1.224	0.5		0.076	1.29	1.447	1.3685	1.2925	105.596	0.157	0.08	0.795	0.785	0.79	0.71	58.0065	0.01	0.077	0.394	0.407	0.4005	0.3235	26.4297	0.013		0.085	0.114	0.073	0.0935	0.0085	0.694444	0.041	0.067	0.087	0.088	0.0875	0.0205	1.67484	0.001	0.094	0.102	0.108	0.105
		Time points [min]	Buffer repeat 1	Buffer repeat 2	Buffer repeat 3	Buffer repeat 4	Average Buffer	std
		0	0.025	0.0275	0.056	0.026	0.033625	0.0129488
		1	0.0435	0.073	0.0905	0.0565	0.065875	0.0176471
		2	0.067	0.1435	0.161	0.115	0.121625	0.0355552
		3	0.1045	0.2485	0.2625	0.183	0.199625	0.0625843
		4	0.141	0.3545	0.374	0.248	0.279375	0.0931795
		5	0.171	0.441	0.4185	0.332	0.340625	0.10605
		6	0.223	0.5725	0.5395	0.4125	0.436875	0.13717
		7	0.352	0.68	0.711	0.4905	0.558375	0.146018
		8	0.4165	0.7805	0.851	0.558	0.6515	0.1735
		9	0.476	0.788	0.8895	0.628	0.695375	0.157265
		10	0.624	0.927	1.022	0.663	0.809	0.169436
		11	0.7	1.048	1.11	0.7375	0.898875	0.181938
		12	0.824	1.145	1.261	0.802	1.008	0.199418
		13	0.8445	1.237	1.284	0.8565	1.0555	0.205716
		14	0.986	1.2735	1.3745	0.8965	1.13262	0.197233
		15	0.9715	1.363	1.4445	0.953	1.183	0.222719
		16	1.0365	1.4235	1.5145	1.064	1.25962	0.212056
		17	1.0785	1.479	1.5535	1.135	1.3115	0.207401
		18	1.139	1.518	1.6105	1.232	1.37488	0.194971
		19	1.1775	1.5665	1.6475	1.3115	1.42575	0.189516
		20	1.224	1.5985	1.6985	1.3635	1.47113	0.187468
[truncated: 239 more columns]

## Sheet: ILs A, K, M
	Time		Buffer Blank	Buffer Reaction	Buffer Reaction	Buffer Reaction	Average	I5zeroed	Buffer	std	Blank 0.025M TmsMs	Reaction 0.025M TmsMs	Reaction 0.025M TmsMs	Reaction 0.025M TmsMs	Average		IL A 0.025M		Blank 0.075M TmsMs	Reaction 0.075M TmsMs	Reaction 0.075M TmsMs	Reaction 0.075M TmsMs	Average		IL A 0.075M		Blank 0.15M TmsMs	Reaction 0.15M TmsMs	Reaction 0.15M TmsMs	Reaction 0.15M TmsMs	Average		IL A 0.15M		Blank 0.3M TmsMs	Reaction 0.3M TmsMs	Reaction 0.3M TmsMs	Reaction 0.3M TmsMs	Average		IL A 0.3M	std	Blank 0.6M TmsMs	Reaction 0.6M TmsMs	Reaction 0.6M TmsMs	Reaction 0.6M TmsMs	Average		IL A 0.6M
	00:00:14	0	0.086	0.103	0.112	0.093	0.102667	-0.0916667	0.0166667		0.07	0.149	0.082	0.12	0.1755	-0.1125	0.1055		0.077	0.118	0.136	0.095	0.116333	-0.0846667	0.0393333		0.082	0.085	0.083	0.076	0.0813333	0	0		0.108	0.069	0.097	0.094	0.0866667	0	0		0.061	0.083	0.089	0.075	0.0823333	-0.011	0.0213333
	00:01:14	1	0.097	0.186	0.206	0.096	0.162667	-0.0426667	0.0656667	0.01	0.066	0.209	0.098	0.152	0.2295	-0.0545	0.1635	0.0403051	0.079	0.165	0.181	0.143	0.163	-0.04	0.084	0.0190788	0.086	0.116	0.104	0.102	0.107333		0.0213333	0.00757188	0.11	0.103	0.113	0.116	0.110667		0.000666667	0.00680686	0.066	0.094	0.093	0.084	0.0903333	-0.008	0.0243333
	00:02:14	2	0.103	0.239	0.271	0.124	0.211333	0	0.108333	0.016	0.073	0.276	0.118	0.188	0.291	0	0.218	0.0622254	0.084	0.214	0.225	0.185	0.208	0	0.124	0.020664	0.086	0.139	0.126	0.116	0.127		0.041	0.0115326	0.109	0.12	0.129	0.139	0.129333		0.0203333	0.00950438	0.066	0.101	0.1	0.094	0.0983333	0	0.0323333
	00:03:14	3	0.098	0.339	0.368	0.151	0.286	0.0796667	0.188	0.0145	0.075	0.334	0.138	0.229	0.3505	0.0575	0.2755	0.0742462	0.088	0.263	0.267	0.224	0.251333	0.0393333	0.163333	0.0237557	0.084	0.165	0.15	0.139	0.151333		0.0673333	0.0130512	0.106	0.139	0.157	0.165	0.153667		0.0476667	0.0133167	0.067	0.109	0.11	0.102	0.107	0.00766667	0.04
	00:04:14	4	0.103	0.461	0.464	0.184	0.369667	0.158333	0.266667	0.0015	0.073	0.402	0.156	0.274	0.416	0.125	0.343	0.0905097	0.088	0.318	0.311	0.267	0.298667	0.0866667	0.210667	0.0276466	0.08	0.192	0.178	0.185	0.185		0.105	0.007	0.107	0.163	0.186	0.195	0.181333		0.0743333	0.0165025	0.068	0.114	0.12	0.113	0.115667	0.0153333	0.0476667
	00:05:14	5	0.107	0.579	0.564	0.238	0.460333	0.245	0.353333	0.0075	0.074	0.466	0.178	0.321	0.4825	0.1905	0.4085	0.10253	0.093	0.379	0.361	0.319	0.353	0.136	0.26	0.0307896	0.082	0.218	0.21	0.221	0.216333		0.134333	0.00568624	0.107	0.199	0.217	0.222	0.212667		0.105667	0.0120968	0.071	0.12	0.129	0.124	0.124333	0.021	0.0533333
	00:06:14	6	0.106	0.665	0.671	0.311	0.549	0.334667	0.443	0.003	0.088	0.542	0.205	0.372	0.5595	0.2535	0.4715	0.120208	0.095	0.442	0.412	0.373	0.409	0.19	0.314	0.0345977	0.078	0.243	0.237	0.273	0.251		0.173	0.0192873	0.106	0.23	0.249	0.25	0.243		0.137	0.0112694	0.073	0.127	0.138	0.129	0.131333	0.026	0.0583333
	00:07:14	7	0.108	0.728	0.739	0.391	0.619333	0.403	0.511333	0.0055	0.08	0.609	0.236	0.426	0.6355	0.3375	0.5555	0.129401	0.095	0.504	0.458	0.425	0.462333	0.243333	0.367333	0.0396779	0.077	0.271	0.271	0.321	0.287667		0.210667	0.0288675	0.106	0.26	0.286	0.274	0.273333		0.167333	0.0130128	0.073	0.135	0.15	0.135	0.14	0.0346667	0.067
	00:08:14	8	0.113	0.758	0.79	0.436	0.661333	0.44	0.548333	0.016	0.084	0.677	0.272	0.539	0.744	0.442	0.66	0.0975807	0.099	0.559	0.508	0.472	0.513	0.29	0.414	0.043715	0.085	0.302	0.305	0.349	0.318667		0.233667	0.0263122	0.108	0.295	0.324	0.299	0.306		0.198	0.0157162	0.079	0.146	0.157	0.145	0.149333	0.038	0.0703333
	00:09:14	9	0.111	0.804	0.855	0.484	0.714333	0.495	0.603333	0.0255	0.087	0.73	0.314	0.581	0.8125	0.5075	0.7255	0.105359	0.091	0.615	0.557	0.516	0.562667	0.347667	0.471667	0.0497427	0.077	0.329	0.334	0.396	0.353		0.276	0.0373229	0.102	0.332	0.355	0.322	0.336333		0.234333	0.0169214	0.079	0.156	0.164	0.153	0.157667	0.0463333	0.0786667
	00:10:14	10	0.105	0.874	0.968	0.521	0.787667	0.574333	0.682667	0.047	0.088	0.79	0.36	0.628	0.889	0.583	0.801	0.114551	0.094	0.67	0.599	0.555	0.608	0.39	0.514	0.0580259	0.074	0.361	0.363	0.405	0.376333		0.302333	0.0248462	0.1	0.368	0.388	0.352	0.369333		0.269333	0.018037	0.077	0.167	0.173	0.163	0.167667	0.0583333	0.0906667
	00:11:14	11	0.106	0.949	1.115	0.583	0.882333	0.668	0.776333	0.083	0.084	0.858	0.407	0.687	0.976	0.674	0.892	0.120915	0.094	0.722	0.639	0.592	0.651	0.433	0.557	0.0658255	0.08	0.393	0.392	0.437	0.407333		0.327333	0.025697	0.1	0.405	0.418	0.396	0.406333		0.306333	0.0110604	0.079	0.177	0.18	0.178	0.178333	0.067	0.0993333
	00:12:14	12	0.107	1.029	1.172	0.671	0.957333	0.742	0.850333	0.0715	0.096	0.898	0.458	0.749	1.0525	0.7385	0.9565	0.105359	0.105	0.758	0.674	0.642	0.691333	0.462333	0.586333	0.059911	0.075	0.42	0.42	0.454	0.431333		0.356333	0.0196299	0.099	0.443	0.444	0.453	0.446667		0.347667	0.00550757	0.077	0.185	0.186	0.189	0.186667	0.0773333	0.109667
	00:13:14	13	0.109	1.128	1.277	0.725	1.04333	0.826	0.934333	0.0745	0.085	0.962	0.513	0.808	1.1415	0.8385	1.0565	0.108894	0.094	0.797	0.702	0.699	0.732667	0.514667	0.638667	0.0557345	0.074	0.45	0.456	0.464	0.456667		0.382667	0.00702377	0.102	0.485	0.472	0.497	0.484667		0.382667	0.0125033	0.078	0.196	0.193	0.202	0.197	0.0866667	0.119
	00:14:14	14	0.106	1.184	1.334	0.76	1.09267	0.878333	0.986667	0.075	0.086	1.027	0.57	0.862	1.2295	0.9255	1.1435	0.116673	0.096	0.832	0.728	0.738	0.766	0.546	0.67	0.057376	0.073	0.465	0.494	0.477	0.478667		0.405667	0.0145717	0.097	0.52	0.501	0.553	0.524667		0.427667	0.0263122	0.076	0.206	0.203	0.21	0.206333	0.098	0.130333
	00:15:14	15	0.107	1.212	1.346	0.794	1.11733	0.902	1.01033	0.067	0.1	1.09	0.625	0.909	1.312	0.994	1.212	0.127986	0.093	0.856	0.747	0.781	0.794667	0.577667	0.701667	0.0557704	0.077	0.476	0.527	0.499	0.500667		0.423667	0.0255408	0.096	0.544	0.529	0.601	0.558		0.462	0.0379868	0.078	0.216	0.212	0.22	0.216	0.105667	0.138
	00:16:14	16	0.113	1.244	1.356	0.853	1.151	0.929667	1.038	0.056	0.1	1.122	0.677	0.952	1.3755	1.0575	1.2755	0.120208	0.092	0.855	0.761	0.817	0.811	0.595	0.719	0.0472864	0.087	0.489	0.564	0.525	0.526		0.439	0.03751	0.098	0.576	0.557	0.615	0.582667		0.484667	0.0295691	0.077	0.224	0.216	0.229	0.223	0.113667	0.146
	00:17:14	17	0.111	1.245	1.358	0.898	1.167	0.947667	1.056	0.0565	0.092	1.148	0.736	0.99	1.437	1.127	1.345	0.111723	0.089	0.868	0.78	0.855	0.834333	0.621333	0.745333	0.0475009	0.073	0.494	0.589	0.558	0.547		0.474	0.0484458	0.096	0.6	0.586	0.626	0.604		0.508	0.0202978	0.077	0.23	0.219	0.23	0.226333	0.117	0.149333
	00:18:14	18	0.111	1.236	1.361	0.941	1.17933	0.96	1.06833	0.0625	0.094	1.172	0.782	1.026	1.49	1.178	1.396	0.103238	0.091	0.875	0.778	0.889	0.847333	0.632333	0.756333	0.0604511	0.072	0.511	0.601	0.597	0.569667		0.497667	0.0508462	0.093	0.615	0.615	0.626	0.618667		0.525667	0.00635085	0.074	0.238	0.221	0.234	0.231	0.124667	0.157
	00:19:14	19	0.114	1.248	1.317	1.006	1.19033	0.968	1.07633	0.0345	0.097	1.188	0.811	1.063	1.531	1.216	1.434	0.0883883	0.09	0.89	0.823	0.923	0.878667	0.664667	0.788667	0.0509542	0.072	0.531	0.607	0.642	0.593333		0.521333	0.056748	0.092	0.632	0.638	0.632	0.634		0.542	0.0034641	0.08	0.243	0.225	0.239	0.235667	0.123333	0.155667
	00:20:14	20	0.115	1.28	1.368	1.058	1.23533	1.012	1.12033	0.044	0.1	1.223	0.772	1.098	1.5465	1.2285	1.4465	0.0883883	0.08	0.911	0.883	0.967	0.920333	0.716333	0.840333	0.0427707	0.072	0.547	0.612	0.677	0.612		0.54	0.065	0.093	0.661	0.663	0.678	0.667333		0.574333	0.00929157	0.075	0.255	0.225	0.246	0.242	0.134667	0.167
	Time		Buffer Blank	Buffer Reaction	Buffer Reaction	Buffer Reaction	Buffer Reaction		Buffer	std	Blank 0.025M SulfI	Reaction 0.025M SulfI	Reaction 0.025M SulfI	Reaction 0.025M SulfI	Average		IL M 0.025M		Blank 0.075M SulfI	Reaction 0.075M SulfI	Reaction 0.075M SulfI	Reaction 0.075M TmsMs	Average		IL M 0.075M		Blank 0.15M SulfI	Reaction 0.15M SulfI	Reaction 0.15M SulfI	Reaction 0.15M TmsMs	Average		IL M 0.15M		Blank 0.3M SulfI	Reaction 0.3M SulfI	Reaction 0.3M SulfI	Reaction 0.3M TmsMs	Average		IL M 0.3M		Blank 0.6M SulfI	Reaction 0.6M SulfI	Reaction 0.6M SulfI	Reaction 0.6M TmsMs	Average		IL M 0.6M
	00:00:14	0	0.04	0.123	0.138	0.121	0.127333	-0.338333	0.0873333		0.051	0.093	0.096	0.082	0.1355	-0.3915	0.0845		0.084	0.095	0.088	0.095	0.0926667	-0.207667	0.00866667		0.104	0.104	0.075	0.076	0.085	0	0		0.074	0.087	0.12	0.094	0.100333	-0.0856667	0.0263333		0.211	0.211	0.115	0.075	0.133667		0
	00:01:14	1	0.055	0.164	0.163	0.167	0.164667	-0.316	0.109667	0.00208167	0.059	0.152	0.125	0.117	0.197	-0.338	0.138	0.0183394	0.089	0.141	0.093	0.143	0.125667	-0.179667	0.0366667	0.00141421	0.124	0.137	0.107	0.102	0.115333		0		0.082	0.1	0.138	0.116	0.118	-0.076	0.036	0.0190788	0.237	0.282	0.132	0.084	0.166		0
	00:02:14	2	0.067	0.192	0.184	0.243	0.206333	-0.286333	0.139333	0.0320052	0.063	0.192	0.158	0.139	0.2445	-0.2945	0.1815	0.0268514	0.094	0.181	0.1	0.185	0.155333	-0.155	0.0613333	0.00282843	0.132	0.145	0.126	0.116	0.129		0		0.088	0.109	0.156	0.139	0.134667	-0.0653333	0.0466667	0.0237978	0.262	0.295	0.142	0.094	0.177		0
	00:03:14	3	0.066	0.237	0.229	0.322	0.262667	-0.229	0.196667	0.0515396	0.066	0.221	0.194	0.182	0.2985	-0.2435	0.2325	0.019975	0.095	0.234	0.108	0.224	0.188667	-0.122667	0.0936667	0.00707107	0.138	0.157	0.135	0.139	0.143667		0.00566667	0.0127279	0.094	0.116	0.174	0.165	0.151667	-0.0543333	0.0576667	0.0312143	0.276	0.294	0.152	0.102	0.182667		0
	00:04:14	4	0.071	0.299	0.274	0.395	0.322667	-0.174	0.251667	0.0638775	0.068	0.253	0.231	0.225	0.3545	-0.1895	0.2865	0.0147422	0.096	0.273	0.117	0.267	0.219	-0.0933333	0.123	0.00424264	0.144	0.17	0.161	0.185	0.172		0.028	0.0106066	0.099	0.129	0.185	0.195	0.169667	-0.0413333	0.0706667	0.0355715	0.275	0.287	0.158	0.113	0.186		0
	00:05:14	5	0.07	0.36	0.321	0.474	0.385	-0.110667	0.315	0.0795047	0.07	0.289	0.269	0.29	0.424	-0.122	0.354	0.0118462	0.099	0.32	0.13	0.319	0.256333	-0.059	0.157333	0.000707107	0.146	0.189	0.176	0.221	0.195333		0.0493333	0.0226274	0.102	0.147	0.196	0.222	0.188333	-0.0256667	0.0863333	0.0380832	0.266	0.275	0.163	0.124	0.187333		0
	00:06:14	6	0.071	0.42	0.385	0.544	0.449667	-0.047	0.378667	0.0835484	0.073	0.319	0.311	0.35	0.49	-0.059	0.417	0.0205994	0.101	0.351	0.146	0.373	0.29	-0.0273333	0.189	0.0155563	0.149	0.21	0.192	0.273	0.225		0.076	0.0445477	0.107	0.164	0.208	0.25	0.207333	-0.0116667	0.100333	0.0430039	0.261	0.248	0.169	0.129	0.182		0
	00:07:14	7	0.078	0.479	0.452	0.58	0.503667	0	0.425667	0.067471	0.077	0.348	0.357	0.401	0.553	0	0.476	0.0283608	0.102	0.372	0.158	0.425	0.318333	0	0.216333	0.0374767	0.146	0.247	0.206	0.321	0.258		0.112	0.0523259	0.115	0.185	0.222	0.274	0.227	0	0.112	0.0447102	0.245	0.209	0.172	0.135	0.172		0
	00:08:14	8	0.07	0.539	0.524	0.641	0.568	0.0723333	0.498	0.0636632	0.076	0.376	0.403	0.452	0.6155	0.0635	0.5395	0.038527	0.1	0.383	0.175	0.472	0.343333	0.027	0.243333	0.0629325	0.148	0.283	0.228	0.349	0.286667		0.138667	0.046669	0.12	0.212	0.233	0.299	0.248	0.016	0.128	0.0453982	0.22	0.174	0.174	0.145	0.164333		0
	00:09:14	9	0.069	0.61	0.608	0.667	0.628333	0.133667	0.559333	0.0335012	0.076	0.423	0.447	0.496	0.683	0.131	0.607	0.0372066	0.101	0.406	0.191	0.516	0.371	0.0536667	0.27	0.0777817	0.142	0.312	0.254	0.396	0.320667		0.178667	0.059397	0.122	0.238	0.243	0.322	0.267667	0.0336667	0.145667	0.0471204	0.191	0.163	0.175	0.153	0.163667		0
	00:10:14	10	0.067	0.692	0.674	0.71	0.692	0.199333	0.625	0.018	0.078	0.472	0.49	0.531	0.7465	0.1925	0.6685	0.0302379	0.1	0.412	0.204	0.555	0.390333	0.074	0.290333	0.101116	0.14	0.334	0.296	0.405	0.345		0.205	0.0502046	0.122	0.259	0.255	0.352	0.288667	0.0546667	0.166667	0.0548847	0.162	0.161	0.178	0.163	0.167333		0.00533333
	00:11:14	11	0.069	0.754	0.7	0.738	0.730667	0.236	0.661667	0.0277369	0.078	0.522	0.53	0.548	0.8	0.246	0.722	0.0133167	0.098	0.437	0.225	0.592	0.418	0.103667	0.32	0.109602	0.137	0.363	0.318	0.437	0.372667		0.235667	0.0523259	0.125	0.278	0.269	0.396	0.314333	0.0773333	0.189333	0.0708684	0.152	0.162	0.178	0.178	0.172667		0.0206667
	00:12:14	12	0.07	0.791	0.73	0.747	0.756	0.260333	0.686	0.0314802	0.08	0.559	0.574	0.568	0.8505	0.2945	0.7705	0.00754983	0.098	0.447	0.241	0.642	0.443333	0.129	0.345333	0.137886	0.135	0.389	0.346	0.454	0.396333		0.261333	0.0459619	0.126	0.299	0.28	0.453	0.344	0.106	0.218	0.0948736	0.156	0.168	0.178	0.189	0.178333		0.0223333
	00:13:14	13	0.07	0.827	0.75	0.814	0.797	0.301333	0.727	0.0412189	0.081	0.575	0.614	0.566	0.8775	0.3205	0.7965	0.0255147	0.097	0.469	0.274	0.699	0.480667	0.167333	0.383667	0.162635	0.133	0.41	0.353	0.464	0.409		0.276	0.0381838	0.126	0.321	0.292	0.497	0.37	0.132	0.244	0.110937	0.157	0.178	0.18	0.202	0.186667		0.0296667
	00:14:14	14	0.07	0.859	0.76	0.718	0.779	0.283333	0.709	0.0723948	0.083	0.628	0.655	0.599	0.941	0.382	0.858	0.028006	0.096	0.486	0.286	0.738	0.503333	0.191	0.407333	0.178191	0.125	0.433	0.367	0.477	0.425667		0.300667	0.0311127	0.129	0.339	0.305	0.553	0.399	0.158	0.27	0.134447	0.16	0.183	0.182	0.21	0.191667		0.0316667
	00:15:14	15	0.073	0.864	0.78	0.766	0.803333	0.304667	0.730333	0.0530031	0.083	0.663	0.699	0.559	0.9605	0.4015	0.8775	0.0727003	0.093	0.509	0.312	0.781	0.534	0.224667	0.441	0.192333	0.127	0.465	0.354	0.499	0.439333		0.312333	0.0240416	0.126	0.359	0.316	0.601	0.425333	0.187333	0.299333	0.153644	0.163	0.19	0.181	0.22	0.197		0.034
	00:16:14	16	0.073	0.87	0.816	0.747	0.811	0.312333	0.738	0.0616523	0.083	0.739	0.734	0.407	0.94	0.381	0.857	0.190253	0.094	0.567	0.343	0.817	0.575667	0.265333	0.481667	0.176777	0.127	0.484	0.382	0.525	0.463667		0.336667	0.0289914	0.131	0.378	0.328	0.615	0.440333	0.197333	0.309333	0.153318	0.165	0.193	0.18	0.229	0.200667		0.0356667
	00:17:14	17	0.073	0.88	0.844	0.796	0.84	0.341333	0.767	0.0421426	0.087	0.749	0.764	0.623	1.068	0.505	0.981	0.0774403	0.096	0.6	0.359	0.855	0.604667	0.292333	0.508667	0.180312	0.122	0.488	0.39	0.558	0.478667		0.356667	0.0494975	0.133	0.402	0.337	0.626	0.455	0.21	0.322	0.151615	0.16	0.198	0.182	0.23	0.203333		0.0433333
	00:18:14	18	0.074	0.917	0.844	0.8	0.853667	0.354	0.779667	0.059096	0.085	0.786	0.799	0.687	1.136	0.575	1.051	0.0612563	0.095	0.558	0.372	0.889	0.606333	0.295	0.511333	0.234052	0.121	0.511	0.376	0.597	0.494667		0.373667	0.0608112	0.137	0.42	0.355	0.626	0.467	0.218	0.33	0.141481	0.169	0.2	0.182	0.234	0.205333		0.0363333
	00:19:14	19	0.077	0.886	0.902	0.798	0.862	0.359333	0.785	0.056	0.087	0.857	0.821	0.742	1.21	0.647	1.123	0.0588246	0.105	0.669	0.386	0.923	0.659333	0.338	0.554333	0.179605	0.119	0.539	0.354	0.642	0.511667		0.392667	0.072832	0.132	0.439	0.364	0.632	0.478333	0.234333	0.346333	0.138262	0.181	0.205	0.187	0.239	0.210333		0.0293333
	00:20:14	20	0.077	0.977	0.835	0.841	0.884333	0.381667	0.807333	0.0803077	0.087	0.824	0.836	0.728	1.194	0.631	1.107	0.0591946	0.107	0.667	0.398	0.967	0.677333	0.354	0.570333	0.212132	0.123	0.541	0.38	0.677	0.532667		0.409667	0.0961665	0.141	0.453	0.368	0.678	0.499667	0.246667	0.358667	0.160182	0.17	0.211	0.19	0.246	0.215667		0.0456667
	Time		Buffer Blank	Buffer Reaction	Buffer Reaction	Buffer Reaction	Average		Buffer	std	Blank 0.025M TpNTf2	Reaction 0.025M TpNTf2	Reaction 0.025M TpNTf2	Reaction 0.025M TpNTf2	Average		IL K 0.025M		Blank 0.075M TpNTf3	Reaction 0.075M TpNTf3	Reaction 0.075M TpNTf3	Reaction 0.075M TpNTf3	Average		IL K 0.075M		Blank 0.15M TpNTf4	Reaction 0.15M TpNTf4	Reaction 0.15M TpNTf4	Reaction 0.15M TpNTf4	Average		IL K 0.15M		Blank 0.3M TpNTf5	Reaction 0.3M TpNTf5	Reaction 0.3M TpNTf5	Reaction 0.3M TpNTf5	Average		IL K 0.3M		Blank 0.6M TpNTf6	Reaction 0.6M TpNTf6	Reaction 0.6M TpNTf6	Reaction 0.6M TpNTf6	Average		IL K 0.6M
	00:00:14	0	0.04	0.123	0.093	0.121	0.112333	-0.639	0.0723333		0.281	0.366	0.249	0.346	0.4805	-1.1395	0.1995		0.229	0.355	0.356	0.351	0.354	-0.719	0.125		0.267	0.415	0.372	0.476	0.421	0	0.054		0.542	0.588	0.66	0.602	0.616667	-1.60667	0.0746667		0.535	1.418	1.569	1.838	1.60833	0.0693333	1.07333
	00:01:14	1	0.055	0.164	0.096	0.167	0.142333	-0.624	0.0873333	0.0327855	0.28	0.475	0.268	0.369	0.556	-1.063	0.276	0.10351	0.239	0.388	0.352	0.366	0.368667	-0.714333	0.129667	0.0181475	0.275	0.458	0.401	0.524	0.461		0.186	0.0615549	0.533	0.656	0.669	0.617	0.647333	-1.567	0.114333	0.0270617	0.562	1.421	1.587	1.814	1.60733	0	1.04533
	00:02:14	2	0.067	0.192	0.124	0.243	0.186333	-0.592	0.119333	0.0487465	0.285	0.515	0.353	0.423	0.6455	-0.9785	0.3605	0.0812486	0.242	0.419	0.357	0.394	0.39	-0.696	0.148	0.0311929	0.298	0.536	0.479	0.565	0.526667		0.228667	0.0437531	0.52	0.681	0.74	0.612	0.677667	-1.52367	0.157667	0.0640651	0.637	1.451	1.575	1.828	1.618	0	0.981
	00:03:14	3	0.066	0.237	0.151	0.322	0.236667	-0.540667	0.170667	0.0698109	0.28	0.568	0.363	0.435	0.683	-0.936	0.403	0.104002	0.248	0.453	0.424	0.437	0.438	-0.654	0.19	0.0145258	0.289	0.622	0.528	0.623	0.591		0.302	0.0545619	0.485	0.72	0.818	0.641	0.726333	-1.44	0.241333	0.0886698	1.07	1.45	1.551	1.849	1.61667	0	0.546667
	00:04:14	4	0.071	0.299	0.184	0.395	0.292667	-0.489667	0.221667	0.0862567	0.27	0.631	0.435	0.473	0.7695	-0.8395	0.4995	0.103942	0.242	0.525	0.419	0.493	0.479	-0.607	0.237	0.0543691	0.28	0.715	0.554	0.706	0.658333		0.378333	0.0904673	0.389	0.782	0.911	0.704	0.799	-1.27133	0.41	0.104542	1.245	1.413	1.55	1.816	1.593	0	0.348
	00:05:14	5	0.07	0.36	0.238	0.474	0.357333	-0.424	0.287333	0.096365	0.259	0.704	0.484	0.508	0.848	-0.75	0.589	0.120687	0.23	0.594	0.451	0.545	0.53	-0.544	0.3	0.0726705	0.278	0.764	0.602	0.847	0.737667		0.459667	0.124605	0.378	0.825	1.024	0.797	0.882	-1.17733	0.504	0.12377	0.842	1.373	1.523	1.811	1.569	0	0.727
	00:06:14	6	0.071	0.42	0.311	0.544	0.425	-0.357333	0.354	0.0951875	0.249	0.789	0.54	0.542	0.9355	-0.6525	0.6865	0.143186	0.22	0.641	0.499	0.609	0.583	-0.481	0.363	0.0744849	0.27	0.843	0.658	0.968	0.823		0.553	0.155965	0.365	0.855	1.201	0.839	0.965	-1.08133	0.6	0.204539	0.542	1.378	1.502	1.778	1.55267	0	1.01067
	00:07:14	7	0.078	0.479	0.391	0.58	0.483333	-0.306	0.405333	0.0772197	0.243	0.846	0.604	0.574	1.012	-0.57	0.769	0.149135	0.22	0.665	0.536	0.667	0.622667	-0.441333	0.402667	0.0750622	0.261	0.908	0.707	1.073	0.896		0.635	0.183295	0.348	0.865	1.331	0.933	1.043	-0.986333	0.695	0.251722	0.486	1.379	1.464	1.771	1.538	0	1.052
	00:08:14	8	0.07	0.539	0.436	0.641	0.538667	-0.242667	0.468667	0.0836912	0.222	0.959	0.687	0.731	1.1885	-0.3725	0.9665	0.146005	0.214	0.786	0.653	0.815	0.751333	-0.306667	0.537333	0.0863848	0.257	1.065	0.852	1.256	1.05767		0.800667	0.2021	0.319	0.969	1.567	1.177	1.23767	-0.762667	0.918667	0.303581	0.791	1.438	1.573	1.803	1.60467	0	0.813667
	00:09:14	9	0.069	0.61	0.484	0.667	0.587	-0.193333	0.518	0.0764591	0.228	1.014	0.739	0.818	1.2855	-0.2815	1.0575	0.141587	0.215	0.789	0.735	0.904	0.809333	-0.249667	0.594333	0.0863153	0.247	1.114	0.937	1.269	1.10667		0.859667	0.166121	0.31	1.315	1.616	1.293	1.408	-0.583333	1.098	0.180469	0.815	1.464	1.524	1.826	1.60467	0	0.789667
	00:10:14	10	0.067	0.692	0.521	0.71	0.641	-0.137333	0.574	0.0851704	0.23	1.044	0.789	0.857	1.345	-0.224	1.115	0.132047	0.213	0.851	0.794	0.961	0.868667	-0.188333	0.655667	0.0848901	0.259	1.163	1.004	1.362	1.17633		0.917333	0.179372	0.298	1.445	1.718	1.416	1.52633	-0.453	1.22833	0.16662	0.78	1.501	1.515	1.817	1.611	0	0.831
	00:11:14	11	0.069	0.754	0.583	0.738	0.691667	-0.0886667	0.622667	0.0771161	0.225	1.092	0.826	0.885	1.4015	-0.1625	1.1765	0.139694	0.203	0.908	0.833	1.009	0.916667	-0.130333	0.713667	0.0883195	0.241	1.185	1.074	1.405	1.22133		0.980333	0.168465	0.3	1.571	1.831	1.553	1.65167	-0.329667	1.35167	0.155568	0.76	1.514	1.512	1.808	1.61133	0	0.851333
	00:12:14	12	0.07	0.791	0.671	0.747	0.736333	-0.045	0.666333	0.049567	0.227	1.127	0.869	0.945	1.4705	-0.0955	1.2435	0.13258	0.21	0.97	0.885	1.029	0.961333	-0.0926667	0.751333	0.0723901	0.233	1.25	1.153	1.36	1.25433		1.02133	0.103568	0.29	1.904	1.901	1.669	1.82467	-0.146667	1.53467	0.13482	0.72	1.602	1.505	1.81	1.639	0	0.919
	00:13:14	13	0.07	0.827	0.725	0.79	0.780667	-0.000666667	0.710667	0.0421611	0.223	1.162	0.905	0.966	1.5165	-0.0455	1.2935	0.13428	0.205	1.048	0.934	1.051	1.011	-0.038	0.806	0.0667008	0.235	1.28	1.218	1.398	1.29867		1.06367	0.0914403	0.289	1.927	1.958	1.817	1.90067	-0.0696667	1.61167	0.0740968	0.756	1.744	1.505	1.766	1.67167	0	0.915667
	00:14:14	14	0.07	0.859	0.76	0.725	0.781333	0	0.711333	0.056747	0.22	1.194	0.948	0.976	1.559	0	1.339	0.134675	0.209	1.111	0.977	1.071	1.053	0	0.844	0.0687895	0.226	1.307	1.291	1.41	1.336		1.11	0.0645833	0.276	1.935	1.996	1.941	1.95733	0	1.68133	0.0336204	0.711	1.879	1.51	1.756	1.715	0	1.004
	00:15:14	15	0.073	0.917	0.794	0.76	0.823667	0.0393333	0.750667	0.0674405	0.215	1.227	0.986	1	1.6065	0.0525	1.3915	0.135281	0.197	1.151	1.012	1.099	1.08733	0.0463333	0.890333	0.0702306	0.223	1.304	1.347	1.435	1.362		1.139	0.0667757	0.276	2.054	2.066	2.057	2.059	0.101667	1.783	0.006245	0.704	1.796	1.508	1.753	1.68567	0	0.981667
	00:16:14	16	0.073	0.886	0.853	0.794	0.844333	0.06	0.771333	0.0380555	0.205	1.274	1.011	1.023	1.654	0.11	1.449	0.1485	0.197	1.178	1.039	1.13	1.11567	0.0746667	0.918667	0.0705998	0.224	1.326	1.401	1.493	1.40667		1.18267	0.0836441	0.291	2.145	2.132	2.174	2.15033	0.178	1.85933	0.0215019	0.695	1.85	1.502	1.756	1.70267	0	1.00767
	00:17:14	17	0.073	0.977	0.898	0.853	0.909333	0.125	0.836333	0.0512532	0.203	1.33	1.045	1.053	1.714	0.172	1.511	0.162285	0.196	1.202	1.068	1.16	1.14333	0.103333	0.947333	0.0685371	0.228	1.358	1.45	1.53	1.446		1.218	0.0860697	0.296	2.105	2.19	2.284	2.193	0.215667	1.897	0.0895377	0.606	1.926	1.516	1.719	1.72033	0.110333	1.11433
	00:18:14	18	0.074	1.029	0.941	0.898	0.956	0.170667	0.882	0.0545222	0.2	1.373	1.078	1.084	1.7675	0.2285	1.5675	0.168613	0.192	1.229	1.09	1.175	1.16467	0.128667	0.972667	0.0700738	0.215	1.395	1.486	1.589	1.49		1.275	0.0970618	0.286	2.303	2.247	2.39	2.31333	0.346	2.02733	0.0720578	0.727	1.991	1.481	1.744	1.73867	0	1.01167
	00:19:14	19	0.077	1.128	1.006	0.941	1.025	0.236667	0.948	0.0775156	0.2	1.405	1.111	1.104	1.81	0.271	1.61	0.171797	0.193	1.24	1.097	1.188	1.175	0.138	0.982	0.0723809	0.213	1.453	1.524	1.652	1.543		1.33	0.100851	0.29	2.343	2.301	2.481	2.375	0.403667	2.085	0.0941701	0.677	2.05	1.5	1.742	1.764	0.083	1.087
	00:20:14	20	0.077	1.184	1.058	1.006	1.08267	0.294333	1.00567	0.0747321	0.201	1.457	1.142	1.125	1.862	0.322	1.661	0.186966	0.194	1.321	1.095	1.201	1.20567	0.167667	1.01167	0.113072	0.213	1.495	1.602	1.7	1.599		1.386	0.102533	0.273	2.385	2.358	2.556	2.433	0.478667	2.16	0.107373	0.687	2.109	1.502	1.716	1.77567	0.0846667	1.08867

[truncated: 1 more columns]
